# Supplementary material for: Access to primary health care services for Indigenous peoples: A framework synthesis
Source: Springer Nature journal article supplement (doi:10.1186/s12939-016-0450-5), 2016-09-30
Supplement: MOESM1 [file 10803684]

**Additional File 1: Summary of Papers included in the Framework Synthesis**

| <b>First Author (Year)</b> | <b>Country</b> | <b>Focus of the Service Delivery Model</b> | <b>Region</b>  | <b>Study Type</b>       |
|----------------------------|----------------|--------------------------------------------|----------------|-------------------------|
| Bennett (1988)             | Australia      | General                                    | Urban          | Case Study              |
| Copeman (1988)             | Australia      | General                                    | Not Applicable | Opinion                 |
| Kahn (1988)                | United States  | Mental health                              | Rural          | Evaluation              |
| Berner (1992)              | Alaska         | General                                    | Remote         | Case Study              |
| West (1993)                | United States  | General                                    | Not Applicable | Case Study              |
| Campbell (1995)            | Australia      | General                                    | Urban          | Case Study              |
| Chiarchiaro (1997)         | United States  | Oral Health                                | Urban          | Qualitative descriptive |
| Wakerman (1998)            | Australia      | General                                    | Remote         | Case Study              |
| Brant (1999)               | United States  | Womens Health                              | mixed          | Evaluation              |
| Crengle (2000)             | New Zealand    | General                                    | Not Applicable | Opinion                 |
| Smith (2000)               | United States  | General                                    | Not Applicable | Evaluation              |
| Baldwin (2001)             | Alaska         | Maternal and child health                  | Remote         | Qualitative descriptive |
| Bartlett (2001)            | Australia      | General                                    | Remote         | Case Study              |
| Taylor (2001)              | Australia      | General                                    | Not Applicable | Opinion                 |
| Ediotr (2002b)             | Australia      | Mental health                              | Urban          | Case Study              |
| Benoit (2003)              | Canada         | Maternal and child health                  | Urban          | Case Study              |

|                  |               |                           |                |                               |
|------------------|---------------|---------------------------|----------------|-------------------------------|
| Dawson (2003)    | Australia     | Chronic disease           | Rural          | Implementation Project        |
| Lantz (2003)     | United States | Cancer                    | Not Applicable | Participatory action research |
| Maniapoto (2003) | New Zealand   | Chronic disease           | Not Applicable | Evaluation                    |
| Nebelkopf (2003) | United States | General                   | Urban          | Case Study                    |
| Lyford (2005)    | New Zealand   | General                   | mixed          | Case Study                    |
| Panaretto (2005) | Australia     | Maternal and child health | Rural          | Evaluation                    |
| Kelagher (2006)  | Australia     | General                   | Remote         | Evaluation                    |
| Allison (2007)   | United States | General                   | Not Applicable | Case Study                    |
| Eby (2007)       | United States | General                   | Urban          | Case Study                    |
| Poroch (2007)    | Australia     | Prison health             | Urban          | Qualitative descriptive       |
| Tyree (2007)     | United States | General                   | Rural          | Qualitative descriptive       |
| Gabrysch (2009)  | South America | Maternal and child health | Rural          | Evaluation                    |
| Maar (2009)      | Canada        | Mental health             | Rural          | Case Study                    |
| Stewart (2009)   | Australia     | General                   | Rural          | Opinion                       |
| Birks (2010)     | Australia     | General                   | Remote         | Case Study                    |
| DiGiacomo (2010) | Australia     | General                   | Urban          | Evaluation                    |
| Auclair (2012)   | Canada        | Mental health             | Rural          | Case Study                    |
| Davy (2012)      | Asia          | General                   | Remote         | Implementation Project        |
| Dyson (2012)     | Australia     | Oral Health               | mixed          | Evaluation                    |

|                                 |               |                           |                |                         |
|---------------------------------|---------------|---------------------------|----------------|-------------------------|
| Murphy (2012)                   | Australia     | Maternal and child health | mixed          | Evaluation              |
| Poroch (2012)                   | Australia     | Prison health             | Urban          | Qualitative descriptive |
| Arora (2013)                    | Canada        | Eye Health                | Remote         | Evaluation              |
| Driscoll (2013)                 | Alaska        | General                   | mixed          | Evaluation              |
| Johnston (2013)                 | Alaska        | General                   | mixed          | Evaluation              |
| Freeman (2014a)                 | Australia     | General                   | Not Applicable | Evaluation              |
| Freeman (2014b)                 | Australia     | General                   | mixed          | Case Study              |
| Gajjar (2014)                   | Australia     | General                   | Urban          | Case Study              |
| Janssen (2014)                  | New Zealand   | Chronic disease           | Urban          | Evaluation              |
| Langwell (2014)                 | United States | General                   | Remote         | Evaluation              |
| Panaretto (2014)                | Australia     | General                   | mixed          | Opinion                 |
| Pelcastre-Villafuerte<br>(2014) | South America | General                   | Rural          | Evaluation              |
| Tongs (2014)                    | Australia     | General                   | Urban          | Case Study              |
| Campbell (2015)                 | Australia     | Oral Health               | mixed          | Case Study              |
| Reeve (2015)                    | Australia     | General                   | Remote         | Evaluation              |
